# Supplementary material for: Emergence and evolution of an interaction between intrinsically disordered proteins
Source: eLife journal article supplement (doi:10.7554/elife.16059), 2017-04-11
Supplement: supp [file elife-16059-supp-v1.zip]

Archive with 6 entries (6 files):
- elife_poa_e16059_Figure_2_figure_supplement_4.pdf
- elife_poa_e16059_Figure_2_figure_supplement_1.pdf
- elife_poa_e16059_Figure_2_figure_supplement_2.pdf
- elife_poa_e16059_Figure_9_source_data_1.txt
- elife_poa_e16059_Figure_2_figure_supplement_3.pdf
- elife_poa_e16059_Figure_9_figure_supplement_1.pdf
