# Supplementary material for: Emergence and evolution of an interaction between intrinsically disordered proteins
Source: eLife journal article supplement (doi:10.7554/elife.16059), 2017-04-11
Supplement: supp [file elife-16059-supp-v1.zip › elife_poa_e16059_Figure_2_figure_supplement_2.pdf]

|                                 |   |   |   |   |   |   |   |   |   |   |   |   |   |   |   |   |   |   |   |   |     |     |     |   |   |   |   |   |
|---------------------------------|---|---|---|---|---|---|---|---|---|---|---|---|---|---|---|---|---|---|---|---|-----|-----|-----|---|---|---|---|---|
| Lytechinus variegatus           | M | S | T | S | V | L | L | G | D | L | S | S | N | G | L | A | G | L | N | N | ... | G   | G   | - | T | G |   |   |
| Strongylocentrotus purpuratus   | M | S | T | S | V | L | L | G | D | L | S | S | N | G | L | A | G | L | N | N | ... | G   | G   | - | T | G |   |   |
| Strongylocentrotus franciscanus | M | S | T | S | V | L | L | G | D | L | S | S | N | G | L | A | G | L | N | N | ... | G   | G   | - | T | G |   |   |
| Saccoglossus kowalewskii        | A | L | S | T | S | V | L | L | G | D | L | S | S | N | G | L | A | G | L | N | N   | ... | G   | G | - | T | G |   |
| Petromyzon marinus              | T | G | T | G | A | L | L | G | L | L | S | L | L | T | G | L | A | L | L | L | L   | ... | L   | L | - | T | G |   |
| Gasterosteus aculeatus          | G | T | T | G | A | L | L | G | L | L | S | L | L | T | G | L | A | L | L | L | L   | ... | L   | L | - | T | G |   |
| Takifugu rubripes               | T | G | T | G | A | L | L | G | L | L | S | L | L | T | G | L | A | L | L | L | L   | ... | L   | L | - | T | G |   |
| Tetraodon nigroviridis          | T | G | T | G | A | L | L | G | L | L | S | L | L | T | G | L | A | L | L | L | L   | ... | L   | L | - | T | G |   |
| Oreochromis niloticus           | G | T | T | G | A | L | L | G | L | L | S | L | L | T | G | L | A | L | L | L | L   | ... | L   | L | - | T | G |   |
| Oryzias latipes                 | G | T | T | G | A | L | L | G | L | L | S | L | L | T | G | L | A | L | L | L | L   | ... | L   | L | - | T | G |   |
| Xiphophorus maculatus           | G | T | T | G | A | L | L | G | L | L | S | L | L | T | G | L | A | L | L | L | L   | ... | L   | L | - | T | G |   |
| Petromyzon marinus              | G | T | T | G | A | L | L | G | L | L | S | L | L | T | G | L | A | L | L | L | L   | ... | L   | L | - | T | G |   |
| Gasterosteus aculeatus          | G | T | T | G | A | L | L | G | L | L | S | L | L | T | G | L | A | L | L | L | L   | ... | L   | L | - | T | G |   |
| Oreochromis niloticus           | A | N | D | T | A | L | L | G | L | V | N | S | L | S | T | G | L | A | L | A | L   | L   | ... | L | L | - | T | G |
| Maylandia zebra                 | A | N | D | T | A | L | L | G | L | V | N | S | L | S | T | G | L | A | L | A | L   | L   | ... | L | L | - | T | G |
| Xiphophorus maculatus           | A | N | D | T | A | L | L | G | L | V | N | S | L | S | T | G | L | A | L | A | L   | L   | ... | L | L | - | T | G |
| Takifugu rubripes               | A | N | D | T | A | L | L | G | L | V | N | S | L | S | T | G | L | A | L | A | L   | L   | ... | L | L | - | T | G |
| Tetraodon nigroviridis          | A | N | D | T | A | L | L | G | L | V | N | S | L | S | T | G | L | A | L | A | L   | L   | ... | L | L | - | T | G |
| Sinocyclocheilus angustiporus   | G | N | D | T | A | L | L | G | L | V | N | S | L | S | T | G | L | A | L | A | L   | L   | ... | L | L | - | T | G |
| Danio rerio                     | G | N | D | T | A | L | L | G | L | V | N | S | L | S | T | G | L | A | L | A | L   | L   | ... | L | L | - | T | G |
| Lepidosteus oculatus            | G | N | D | T | A | L | L | G | L | V | N | S | L | S | T | G | L | A | L | A | L   | L   | ... | L | L | - | T | G |
| Anas platyrhynchos              | G | N | D | T | A | L | L | G | L | V | N | S | L | S | T | G | L | A | L | A | L   | L   | ... | L | L | - | T | G |
| Latimeria chalumnae             | G | N | D | T | A | L | L | G | L | V | N | S | L | S | T | G | L | A | L | A | L   | L   | ... | L | L | - | T | G |
| Sarcophyllus harrisi            | G | N | D | T | A | L | L | G | L | V | N | S | L | S | T | G | L | A | L | A | L   | L   | ... | L | L | - | T | G |
| Macropsis eugeni                | G | N | D | T | A | L | L | G | L | V | N | S | L | S | T | G | L | A | L | A | L   | L   | ... | L | L | - | T | G |
| Anolis carolinensis             | G | N | D | T | A | L | L | G | L | V | N | S | L | S | T | G | L | A | L | A | L   | L   | ... | L | L | - | T | G |
| Gallus gallus                   | G | N | D | T | A | L | L | G | L | V | N | S | L | S | T | G | L | A | L | A | L   | L   | ... | L | L | - | T | G |
| Meleagris gallopavo             | G | N | D | T | A | L | L | G | L | V | N | S | L | S | T | G | L | A | L | A | L   | L   | ... | L | L | - | T | G |
| Coturnix japonica               | G | N | D | T | A | L | L | G | L | V | N | S | L | S | T | G | L | A | L | A | L   | L   | ... | L | L | - | T | G |
| Poladicus sinensis              | G | N | D | T | A | L | L | G | L | V | N | S | L | S | T | G | L | A | L | A | L   | L   | ... | L | L | - | T | G |
| Chrysemys picta bellii          | G | N | D | T | A | L | L | G | L | V | N | S | L | S | T | G | L | A | L | A | L   | L   | ... | L | L | - | T | G |
| Xenopus tropicalis              | G | N | D | T | A | L | L | G | L | V | N | S | L | S | T | G | L | A | L | A | L   | L   | ... | L | L | - | T | G |
| Ochotona princeps               | G | N | D | T | A | L | L | G | L | V | N | S | L | S | T | G | L | A | L | A | L   | L   | ... | L | L | - | T | G |
| Procavia capensis               | G | N | D | T | A | L | L | G | L | V | N | S | L | S | T | G | L | A | L | A | L   | L   | ... | L | L | - | T | G |
| Sorex araneus                   | G | N | D | T | A | L | L | G | L | V | N | S | L | S | T | G | L | A | L | A | L   | L   | ... | L | L | - | T | G |
| Bos taurus                      | G | N | D | T | A | L | L | G | L | V | N | S | L | S | T | G | L | A | L | A | L   | L   | ... | L | L | - | T | G |
| Erinaceus europaeus             | G | N | D | T | A | L | L | G | L | V | N | S | L | S | T | G | L | A | L | A | L   | L   | ... | L | L | - | T | G |
| Myotis lucifugus                | G | N | D | T | A | L | L | G | L | V | N | S | L | S | T | G | L | A | L | A | L   | L   | ... | L | L | - | T | G |
| Pan troglodytes                 | G | N | D | T | A | L | L | G | L | V | N | S | L | S | T | G | L | A | L | A | L   | L   | ... | L | L | - | T | G |
| Homo sapiens                    | G | N | D | T | A | L | L | G | L | V | N | S | L | S | T | G | L | A | L | A | L   | L   | ... | L | L | - | T | G |
| Gorilla gorilla gorilla         | G | N | D | T | A | L | L | G | L | V | N | S | L | S | T | G | L | A | L | A | L   | L   | ... | L | L | - | T | G |
| Nomascus leucogenys             | G | N | D | T | A | L | L | G | L | V | N | S | L | S | T | G | L | A | L | A | L   | L   | ... | L | L | - | T | G |
| Callithrix jacchus              | G | N | D | T | A | L | L | G | L | V | N | S | L | S | T | G | L | A | L | A | L   | L   | ... | L | L | - | T | G |
| Pongo abelii                    | G | N | D | T | A | L | L | G | L | V | N | S | L | S | T | G | L | A | L | A | L   | L   | ... | L | L | - | T | G |
| Sus scrofa                      | G | N | D | T | A | L | L | G | L | V | N | S | L | S | T | G | L | A | L | A | L   | L   | ... | L | L | - | T | G |
| Equus caballus                  | G | N | D | T | A | L | L | G | L | V | N | S | L | S | T | G | L | A | L | A | L   | L   | ... | L | L | - | T | G |
| Mustela putorius furo           | G | N | D | T | A | L | L | G | L | V | N | S | L | S | T | G | L | A | L | A | L   | L   | ... | L | L | - | T | G |
| Canis lupus familiaris          | G | N | D | T | A | L | L | G | L | V | N | S | L | S | T | G | L | A | L | A | L   | L   | ... | L | L | - | T | G |
| Alluropoda melanoleuca          | G | N | D | T | A | L | L | G | L | V | N | S | L | S | T | G | L | A | L | A | L   | L   | ... | L | L | - | T | G |
| Tarsipes trunctatus             | G | N | D | T | A | L | L | G | L | V | N | S | L | S | T | G | L | A | L | A | L   | L   | ... | L | L | - | T | G |
| Tarsius syrichta                | G | N | D | T | A | L | L | G | L | V | N | S | L | S | T | G | L | A | L | A | L   | L   | ... | L | L | - | T | G |
| Loxodonta africana              | G | N | D | T | A | L | L | G | L | V | N | S | L | S | T | G | L | A | L | A | L   | L   | ... | L | L | - | T | G |
| Otolemur garnettii              | G | N | D | T | A | L | L | G | L | V | N | S | L | S | T | G | L | A | L | A | L   | L   | ... | L | L | - | T | G |
| Macaca mulatta                  | G | N | D | T | A | L | L | G | L | V | N | S | L | S | T | G | L | A | L | A | L   | L   | ... | L | L | - | T | G |
| Cavia porcellus                 | G | N | D | T | A | L | L | G | L | V | N | S | L | S | T | G | L | A | L | A | L   | L   | ... | L | L | - | T | G |
| Dasyptes novemcinctus           | G | N | D | T | A | L | L | G | L | V | N | S | L | S | T | G | L | A | L | A | L   | L   | ... | L | L | - | T | G |
| Felis catus                     | G | N | D | T | A | L | L | G | L | V | N | S | L | S | T | G | L | A | L | A | L   | L   | ... | L | L | - | T | G |
| Mus musculus                    | G | N | D | T | A | L | L | G | L | V | N | S | L | S | T | G | L | A | L | A | L   | L   | ... | L | L | - | T | G |
| Rattus norvegicus               | G | N | D | T | A | L | L | G | L | V | N | S | L | S | T | G | L | A | L | A | L   | L   | ... | L | L | - | T | G |
| Oryctolagus cuniculus           | G | N | D | T | A | L | L | G | L | V | N | S | L | S | T | G | L | A | L | A | L   | L   | ... | L | L | - | T | G |
| Lepidosteus oculatus            | G | N | D | T | A | L | L | G | L | V | N | S | L | S | T | G | L | A | L | A | L   | L   | ... | L | L | - | T | G |
| Danio rerio                     | G | N | D | T | A | L | L | G | L | V | N | S | L | S | T | G | L | A | L | A | L   | L   | ... | L | L | - | T | G |
| Tetraodon nigroviridis          | G | N | D | T | A | L | L | G | L | V | N | S | L | S | T | G | L | A | L | A | L   | L   | ... | L | L | - | T | G |
| Takifugu rubripes               | G | N | D | T | A | L | L | G | L | V | N | S | L | S | T | G | L | A | L | A | L   | L   | ... | L | L | - | T | G |
| Oryzias latipes                 | G | N | D | T | A | L | L | G | L | V | N | S | L | S | T | G | L | A | L | A | L   | L   | ... | L | L | - | T | G |
| Xiphophorus maculatus           | G | N | D | T | A | L | L | G | L | V | N | S | L | S | T | G | L | A | L | A | L   | L   | ... | L | L | - | T | G |
| Oreochromis niloticus           | G | N | D | T | A | L | L | G | L | V | N | S | L | S | T | G | L | A | L | A | L   | L   | ... | L | L | - | T | G |
| Scyllorhinus canicula           | T | S | T | S | V | L | L | G | D | L | S | S | N | G | L | A | G | L | N | N | ... | G   | G   | - | T | G |   |   |
| Leucoraja erinacea              | A | N | D | T | A | L | L | G | L | V | N | S | L | S | T | G | L | A | L | A | L   | L   | ... | L | L | - | T | G |
| Xenopus laevis                  | G | N | D | T | A | L | L | G | L | V | N | S | L | S | T | G | L | A | L | A | L   | L   | ... | L | L | - | T | G |
| Xenopus tropicalis              | G | N | D | T | A | L | L | G | L | V | N | S | L | S | T | G | L | A | L | A | L   | L   | ... | L | L | - | T | G |
| Xenopus laevis                  | G | N | D | T | A | L | L | G | L | V | N | S | L | S | T | G | L | A | L | A | L   | L   | ... | L | L | - | T | G |
| Anas platyrhynchos              | G | N | D | T | A | L | L | G | L | V | N | S | L | S | T | G | L | A | L | A | L   | L   | ... | L | L | - | T | G |
| Coturnix japonica               | G | N | D | T | A | L | L | G | L | V | N | S | L | S | T | G | L | A | L | A | L   | L   | ... | L | L | - | T | G |
| Taeniopygia guttata             | G | N | D | T | A | L | L | G | L | V | N | S | L | S | T | G | L | A | L | A | L   | L   | ... | L | L | - | T | G |
| Meleagris gallopavo             | G | N | D | T | A | L | L | G | L | V | N | S | L | S | T | G | L | A | L | A | L   | L   | ... | L | L | - | T | G |
| Gallus gallus                   | G | N | D | T | A | L | L | G | L | V | N | S | L | S | T | G | L | A | L | A | L   | L   | ... | L | L | - | T | G |
| Ornithorhynchus anatinus        | G | N | D | T | A | L | L | G | L | V | N | S | L | S | T | G | L | A | L | A | L   | L   | ... | L | L | - | T | G |
| Anolis carolinensis             | G | N | D | T | A | L | L | G | L | V | N | S | L | S | T | G | L | A | L | A | L   | L   | ... | L | L | - | T | G |
| Erinaceus europaeus             | G | N | D | T | A | L | L | G | L | V | N | S | L | S | T | G | L | A | L | A | L   | L   | ... | L | L | - |   |   |
