# Supplementary figures and images for: Emergence and evolution of an interaction between intrinsically disordered proteins
Source: eLife journal article supplement (doi:10.7554/elife.16059), 2017-04-11

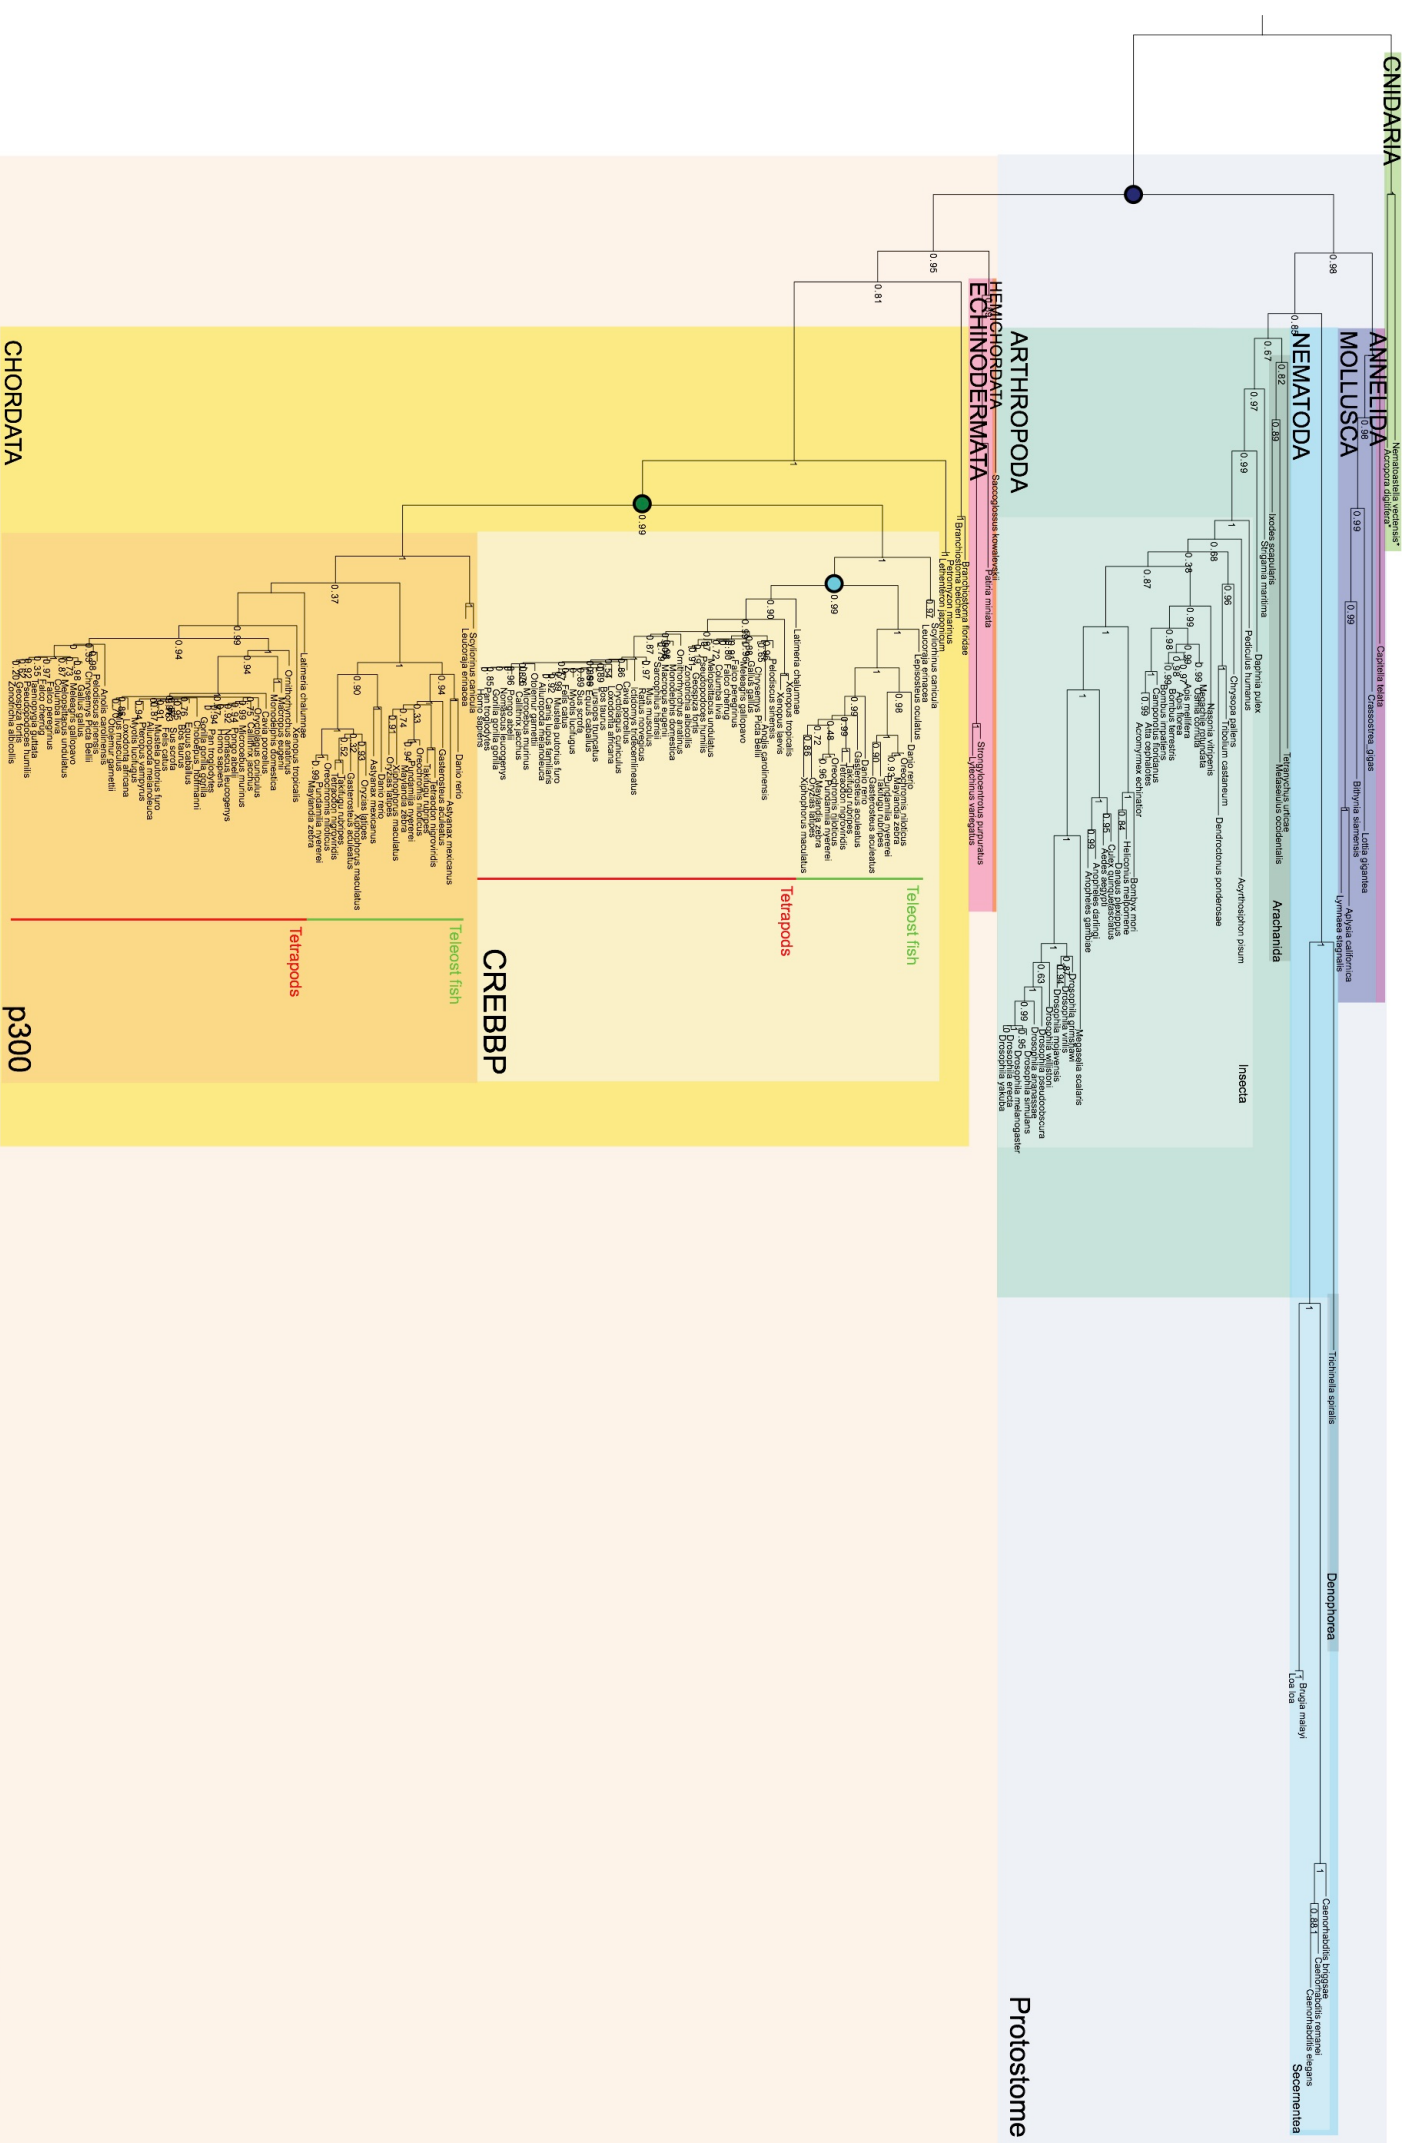

Supplement: supp [file elife-16059-supp-v1.zip › elife_poa_e16059_Figure_2_figure_supplement_3.pdf]

**A**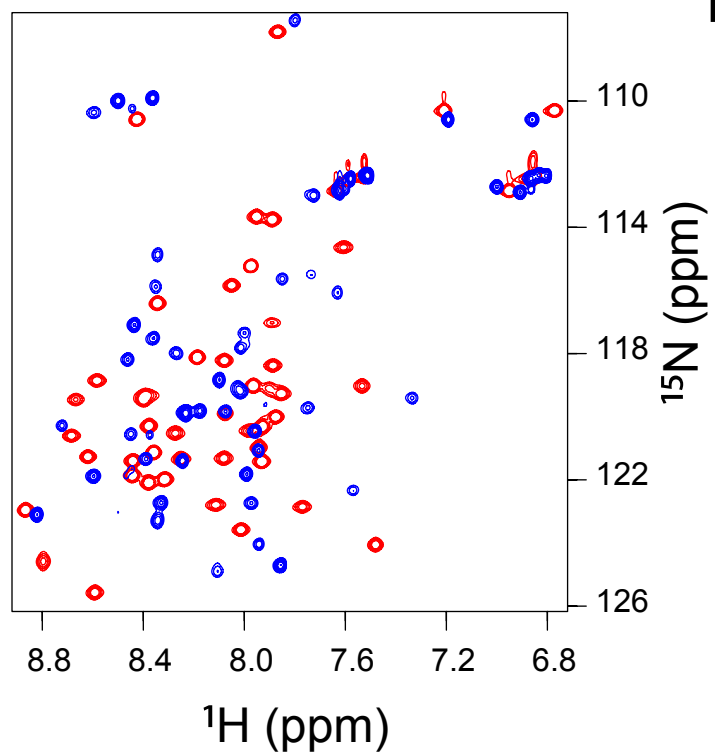**B**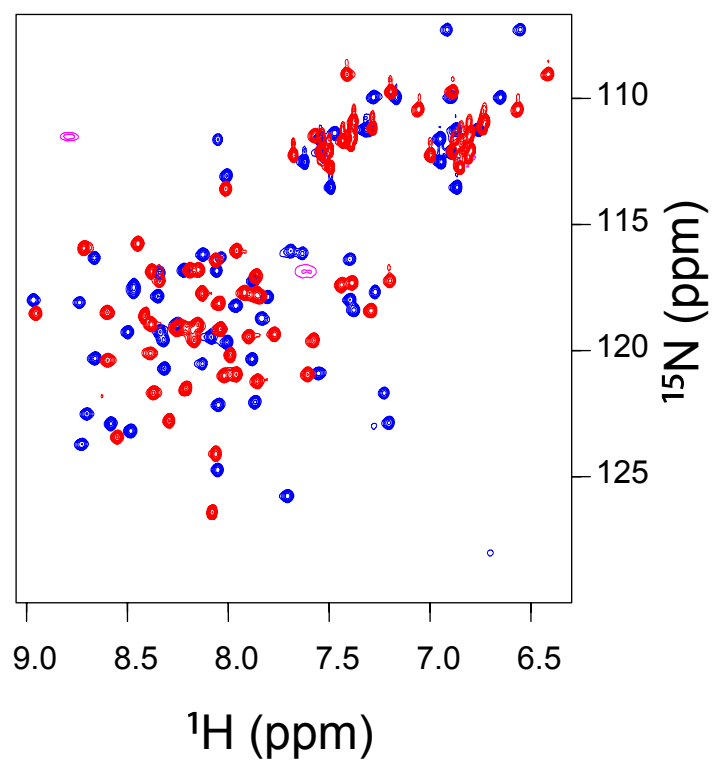

Supplement: supp [file elife-16059-supp-v1.zip › elife_poa_e16059_Figure_9_figure_supplement_1.pdf]
